# Supplementary material for: Ground state spectroscopy of hydroxyquinolines: evidence for the formation of protonated species in water-rich dioxane–water mixtures
Source: Royal Society of Chemistry journal article supplement (doi:10.1039/c3cp52811a), 2013-10-11
Supplement: c3cp52811a.pdf [file c3cp52811a.pdf]

## SUPPLEMENTARY INFORMATION

### **Ground State Spectroscopy of Hydroxyquinolines: Evidence for the Formation of Protonated Species in Water-Rich Dioxane/Water Mixtures**

**Osama K. Abou-Zied,<sup>†,\*</sup> John Husband,<sup>†</sup> Najla Al-Lawatia,<sup>†</sup> Thomas B. Steinbrecher<sup>‡</sup>**

<sup>†</sup> *Department of Chemistry, Faculty of Science, Sultan Qaboos University, P.O. Box 36, Postal Code 123, Muscat, Sultanate of Oman*

<sup>‡</sup> *Department for Theoretical Chemical Biology, Institute for Physical Chemistry, Kaiserstr. 12, Karlsruhe Institute of Technology, 76131 Karlsruhe, Germany*

---

\* Corresponding author. Tel.: (+968) 2414-1468. Fax: (+968) 2414-1469. E-mail: abouzied@squ.edu.om.

### Absorption spectra of 6HQ in dioxane/water binary mixtures

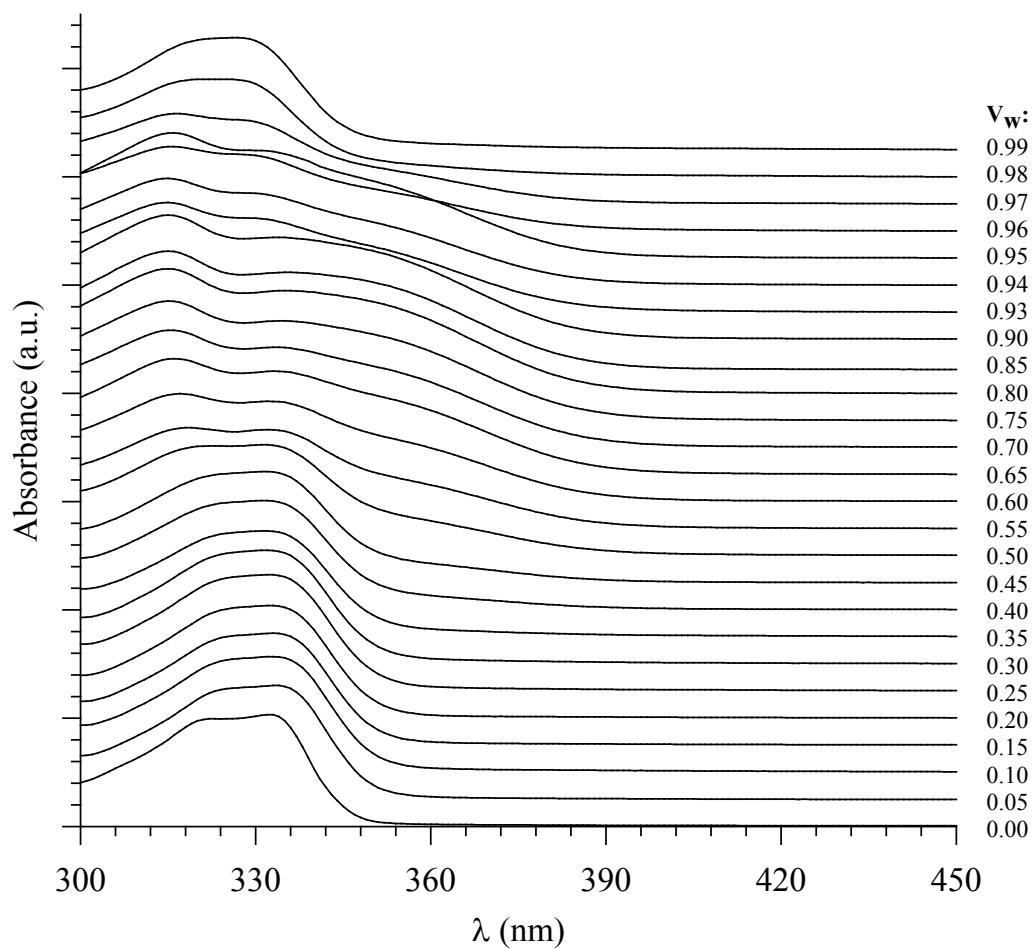

**Fig. S1** Absorption spectra of 6HQ in dioxane/water binary mixtures. The values on the right correspond to water volume fraction in the mixture ( $V_w$ ).

### Absorption spectra of 7HQ in dioxane/water binary mixtures

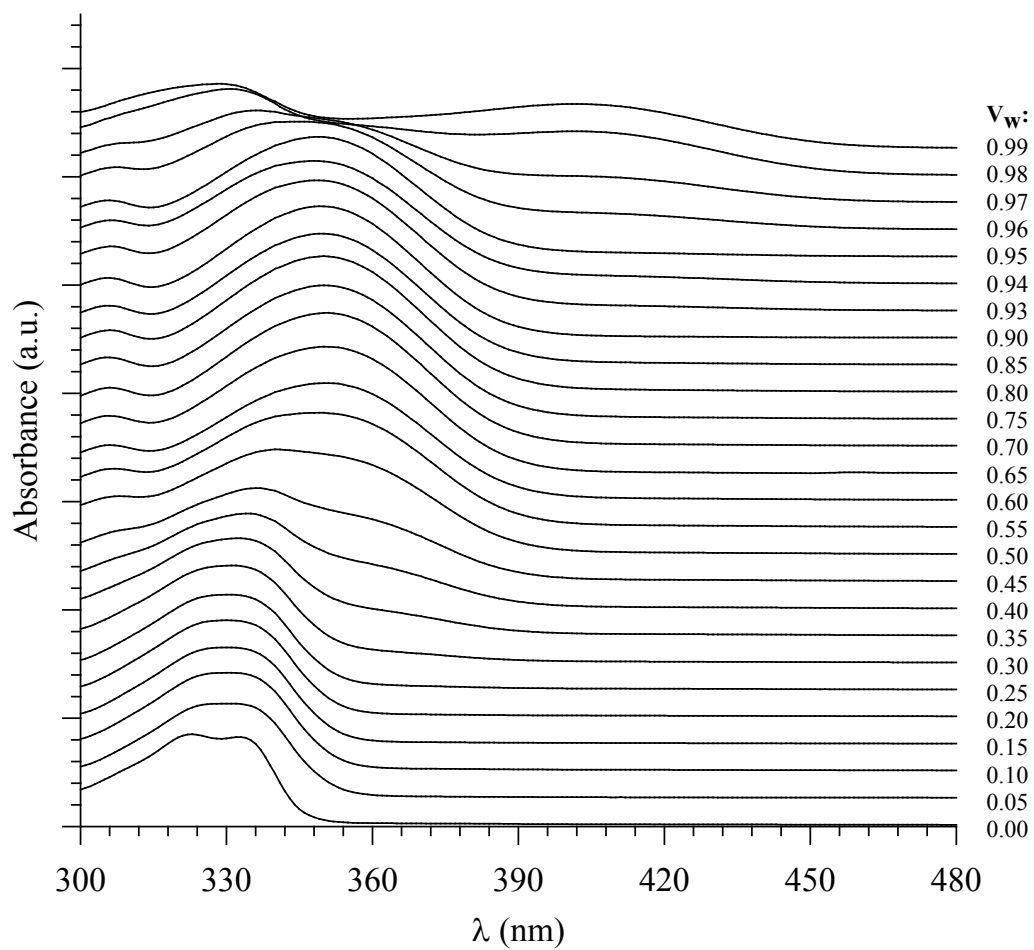

**Fig. S2** Absorption spectra of 7HQ in dioxane/water binary mixtures. The values on the right correspond to water volume fraction in the mixture ( $V_w$ ).

### Absorption spectra of 8HQ in dioxane/water binary mixtures

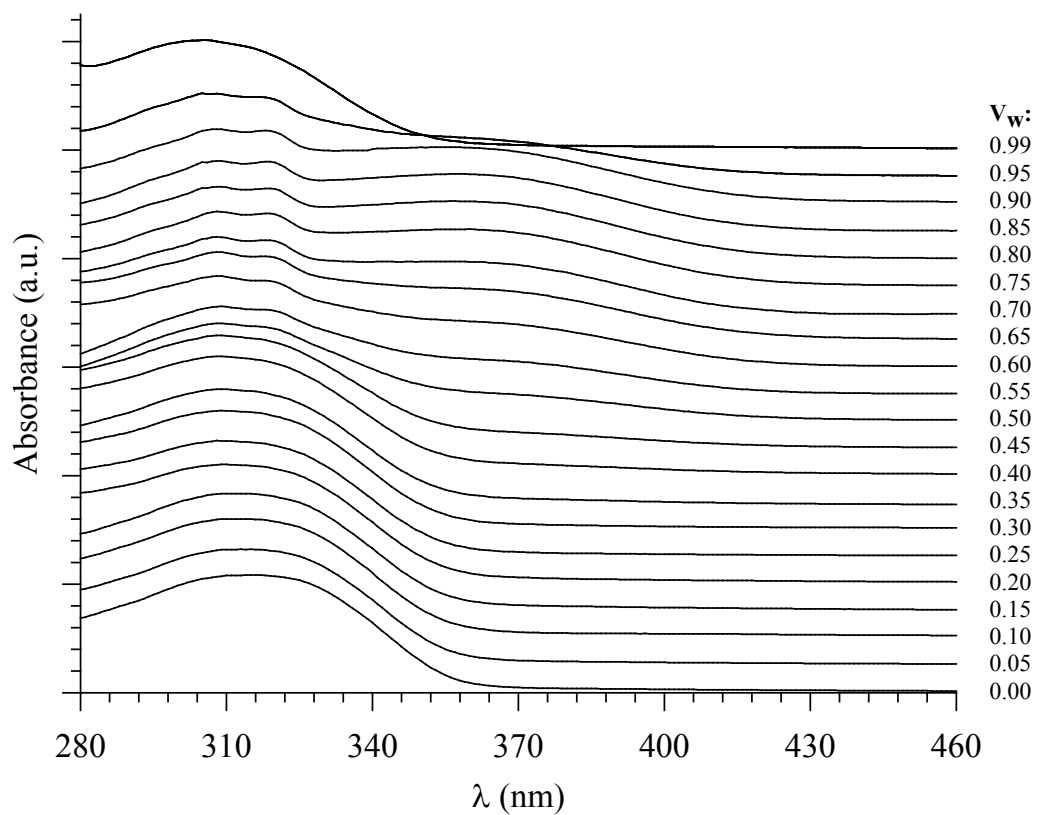

**Fig. S3** Absorption spectra of 8HQ in dioxane/water binary mixtures. The values on the right correspond to water volume fraction in the mixture ( $V_w$ ).

### Absorption spectra of 6HQ in dioxane/methanol binary mixtures

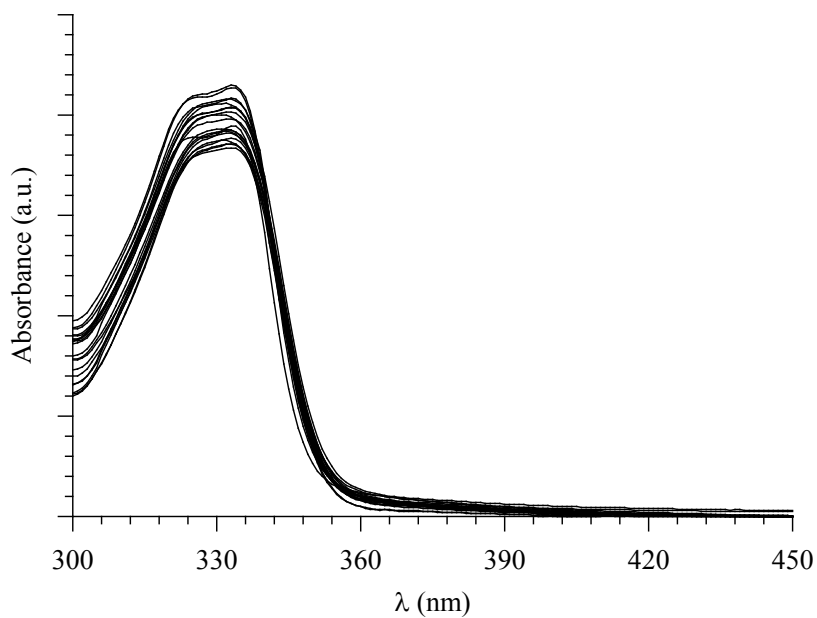

**Fig. S4** Absorption spectra of 6HQ in dioxane/methanol binary mixtures.

### Absorption spectra of 6HQ in methanol/water binary mixtures

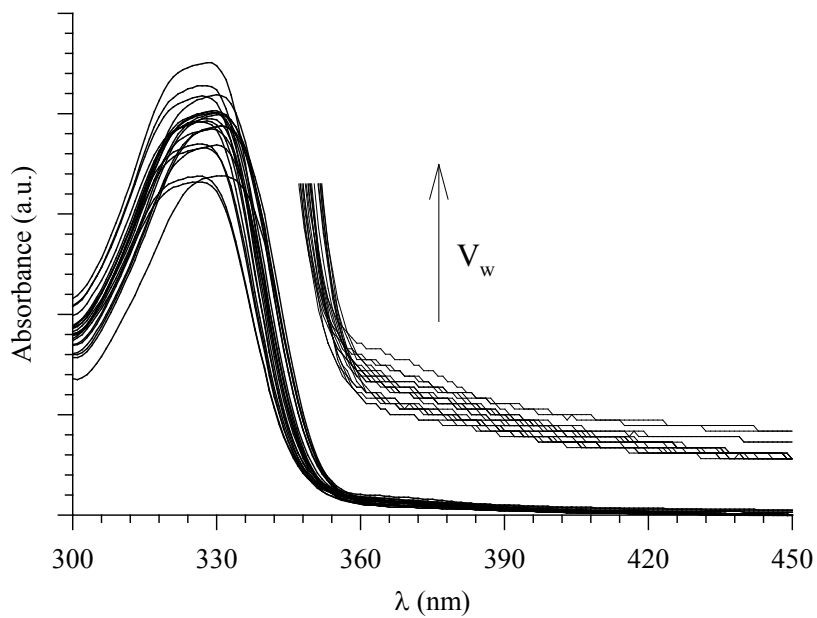

**Fig. S5** Absorption spectra of 6HQ in methanol/water binary mixtures.
